# Supplementary material
Source: PubMed Central journal article supplement (PMC4770575)

**a** Meiosis I nondisjunction:

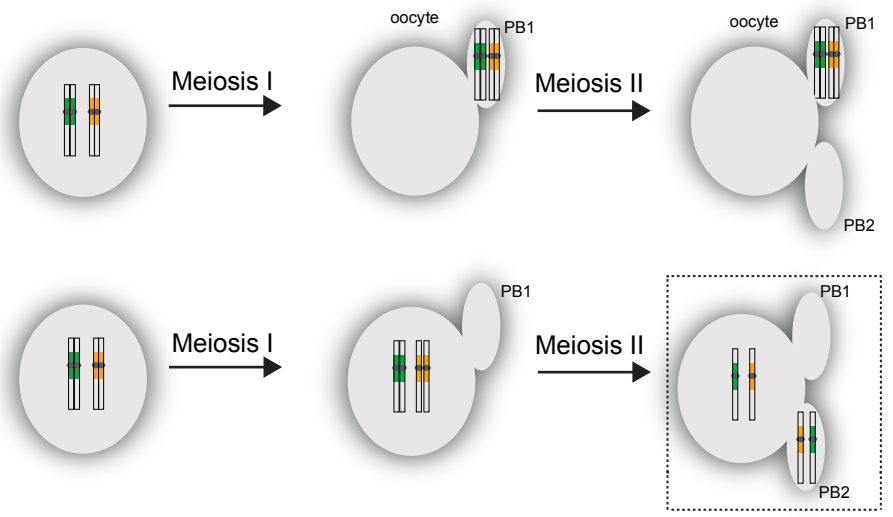

**b** Precocious separation of sister chromatids (PSSC):

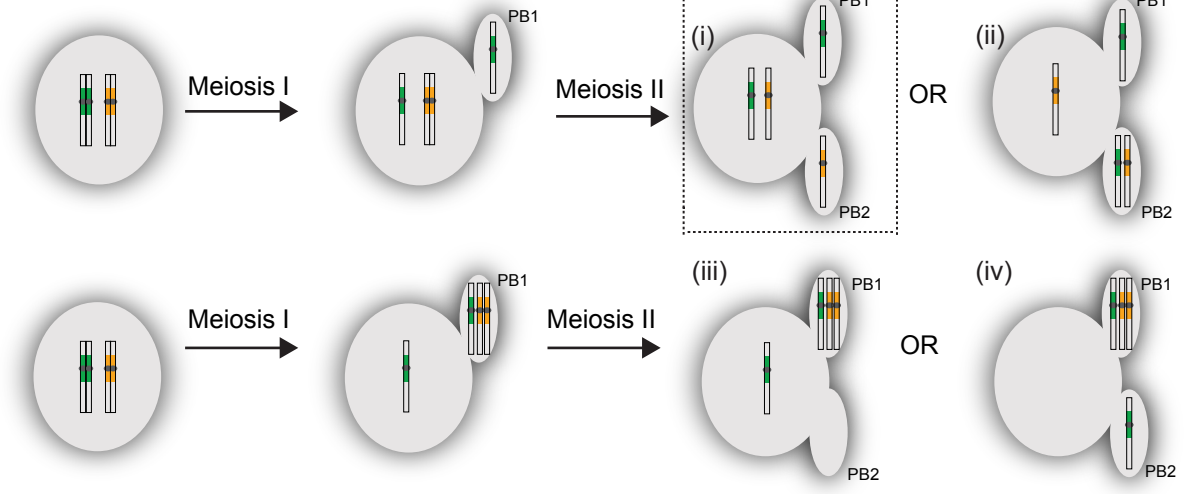

**c** MII nondisjunction or PSSC with normal MI segregation:

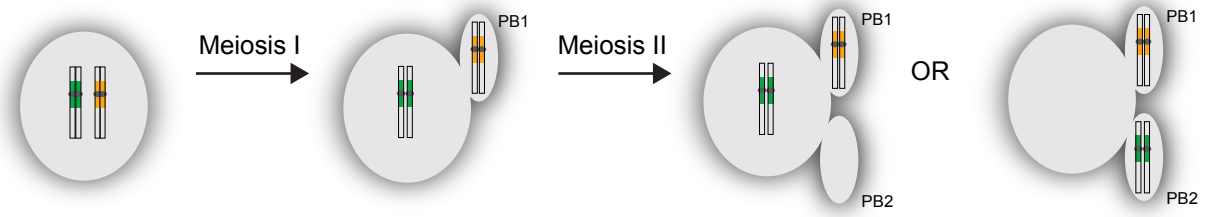

**d** Reverse segregation (Rev Seg):

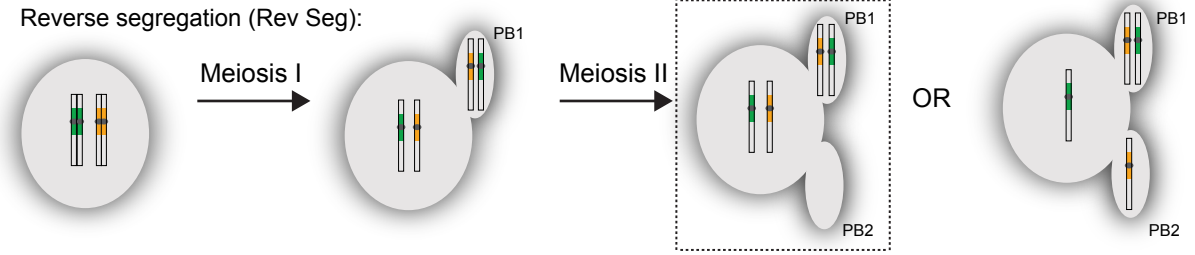

Supplement: NIHMS63148-supplement-Fig_S3.pdf [file NIHMS63148-supplement-Fig_S3.pdf]
