# Supplementary material
Source: PubMed Central journal article supplement (PMC4770575)

**a** Normal segregation of inferred E0

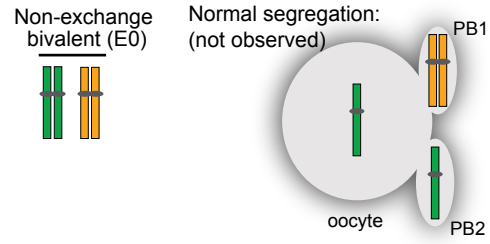

**b** Reverse segregation of inferred E0

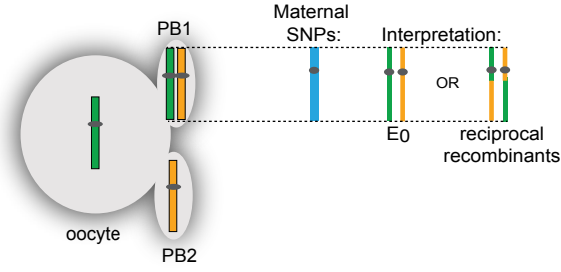

**c** PSSC of inferred E0

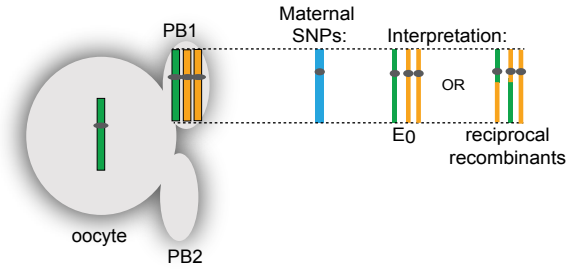

**d** E0 with aneuploid oocyte (RS)

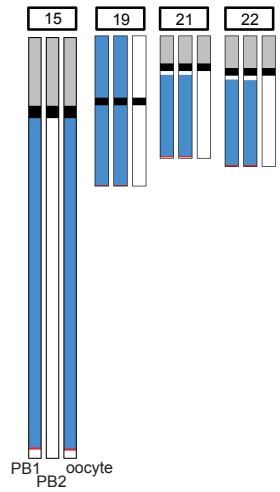

**e** E0 with euploid oocyte (RS)

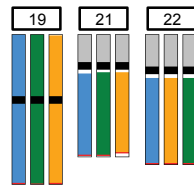

**f** E0 with aneuploid oocyte (PSSC)

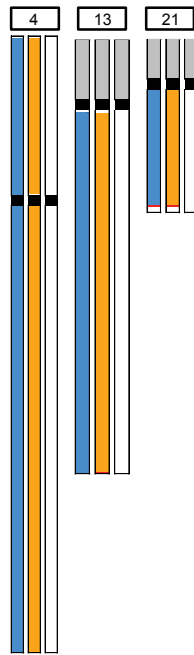

**g** E0 with euploid oocyte (PSSC)

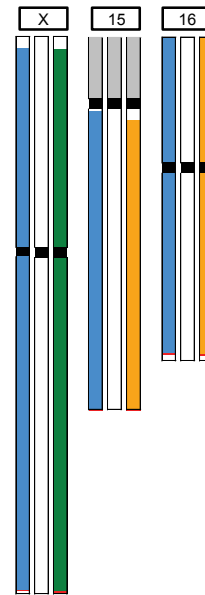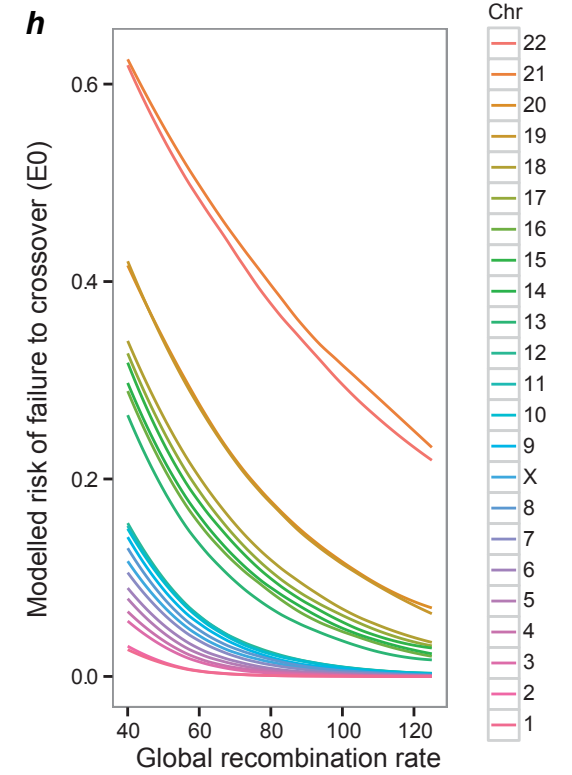

Supplement: NIHMS63148-supplement-Fig_S6.pdf [file NIHMS63148-supplement-Fig_S6.pdf]
