# Supplementary material
Source: PubMed Central journal article supplement (PMC4770575)
Supplement: NIHMS63148-supplement-Tables_S1-S2.pdf [file NIHMS63148-supplement-Tables_S1-S2.pdf]

## Supplementary Table 1. Donor information for embryos<sup>a</sup>

| Donor ID          | Age | Oocytes Retrieved | No. Embryos Analysed | Stage of pre-implantation embryo development |        |            | Permis sion to biopsy PBs | No. Embryos Transferred | Live Birth Outcome <sup>d</sup> | Reason for karyomapping                                        |
|-------------------|-----|-------------------|----------------------|----------------------------------------------|--------|------------|---------------------------|-------------------------|---------------------------------|----------------------------------------------------------------|
|                   |     |                   |                      | Cleavage                                     | Morula | Blastocyst |                           |                         |                                 |                                                                |
| LB01              | 38  | 8                 | 4                    | 2                                            | 1      | 1          | no                        | 1                       | Live birth                      | PGD for single gene disorder and PGS for advanced maternal age |
| LB02 <sup>b</sup> | 35  | 10                | 6                    | 2                                            | 0      | 4          | no                        | 2                       | Twin live birth                 | PGD for single gene disorder                                   |
| LB03              | 38  | 21                | 10                   | 5                                            | 1      | 4          | 9 <sup>c</sup>            | 1                       | None                            | PGS for recurrent miscarriage                                  |
| LB04              | 34  | 23                | 8                    | 5                                            | 3      | 0          | no                        | 1                       | None                            | PGD for paternal translocation                                 |
| LB05 <sup>e</sup> | 41  | 27                | 10                   | 10                                           | 0      | 0          | no                        | 1                       | Live Birth                      | PGS for advanced maternal age                                  |
| <b>Total:</b>     |     |                   | <b>38</b>            |                                              |        |            | <b>9</b>                  | <b>5</b>                | <b>3</b>                        |                                                                |

<sup>a</sup>From The Bridge Centre, UK. Diagnostic follow-up in compliance with the code of practise (HFEA).

<sup>b</sup>Donor of the two MII-arrested oocyte-PB1 duos (see Methods).

<sup>c</sup>Corresponding embryo with both polar bodies analysed for MeioMapping.

<sup>d</sup>embryo giving rise to live births not mapped.

<sup>e</sup>Paternal translocation chromosomes were excluded from the analysis.

**Supplementary Table 2. Donor information for oocyte-PB trios**

| StudyID | oocytes collected | oocytes vitrified | Oocytes used for study | Oocytes after warming | Activated oocytes | Complete trios amplified | Patient age | Pregnancy from cycle | Reason for infertility |
|---------|-------------------|-------------------|------------------------|-----------------------|-------------------|--------------------------|-------------|----------------------|------------------------|
| G01     | 10                | 10                | 4                      | 4                     | 2                 | 0                        | 37.4        | no                   | idiopathic             |
| G02     | 6                 | 3                 | 3                      | 3                     | 3                 | 0                        | 36.2        | yes                  | male factor            |
| G03     | 15                | 10                | 10                     | 5                     | 3                 | 0                        | 37.6        | yes                  | male factor            |
| G04*    | 11                | 5                 | 5                      | 5                     | 5                 | 3                        | 35.7        | no                   | male factor            |
| G05     | 11                | 6                 | 3                      | 3                     | 3                 | 0                        | 37.3        | yes                  | idiopathic             |
| G06*    | 12                | 6                 | 6                      | 5                     | 4                 | 4                        | 40.6        | yes                  | male factor            |
| G07*    | 16                | 9                 | 6                      | 6                     | 5                 | 1                        | 38.4        | yes                  | tubal                  |
| G08*    | 10                | 7                 | 5                      | 5                     | 5                 | 3                        | 37.9        | yes                  | endometriosis          |
| G09*    | 12                | fresh             | 2                      | 2                     | 2                 | 2                        | 33.2        | yes                  | male factor            |
| G10     | 18                | 18                | 3                      | 2                     | 2                 | 0                        | 39.0        | no                   | male factor            |
|         |                   |                   | <b>Total:</b>          | <b>40</b>             | <b>34</b>         | <b>13</b>                | <b>37.3</b> |                      |                        |

\*trios used to generate MeioMaps. Average age: 37.2 years.
