# Supplementary material
Source: PubMed Central journal article supplement (PMC4770575)

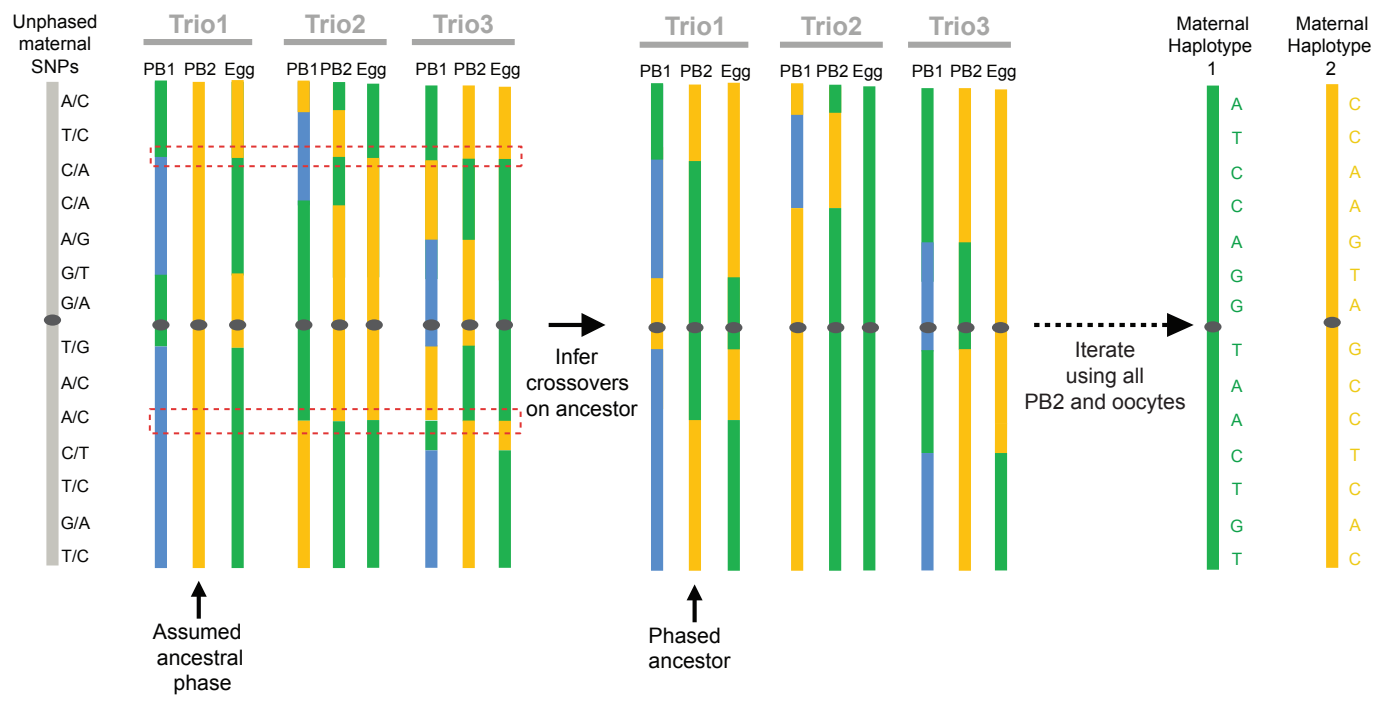

Supplement: NIHMS63148-supplement-Fig_S1.pdf [file NIHMS63148-supplement-Fig_S1.pdf]

G04\_Trio 1

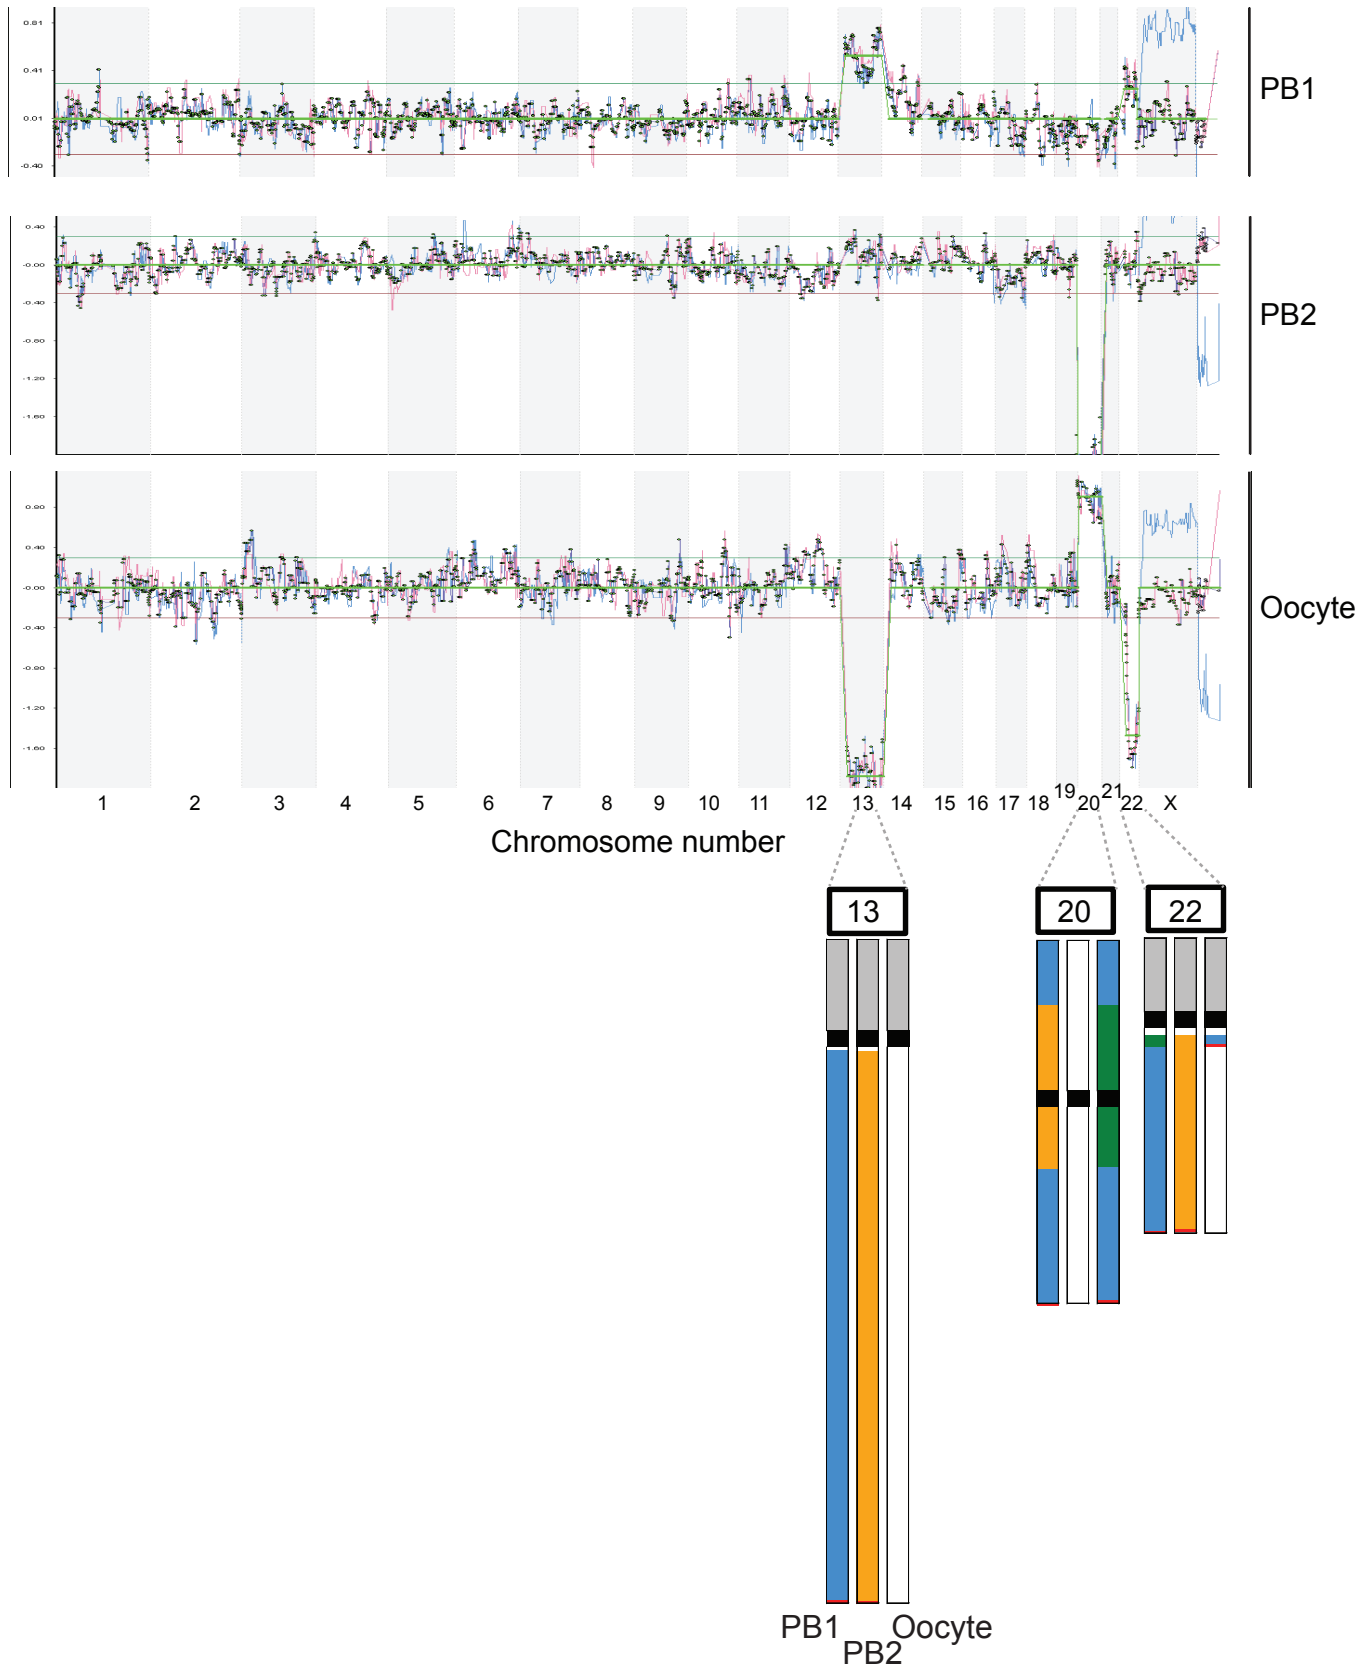

Supplement: NIHMS63148-supplement-Fig_S2.pdf [file NIHMS63148-supplement-Fig_S2.pdf]

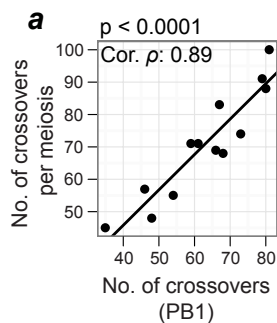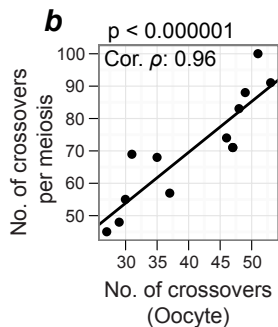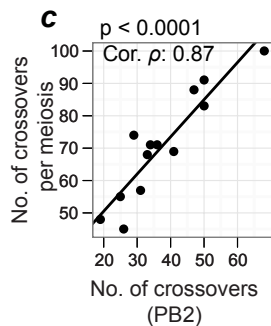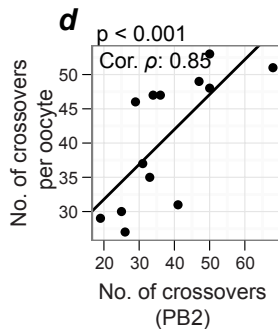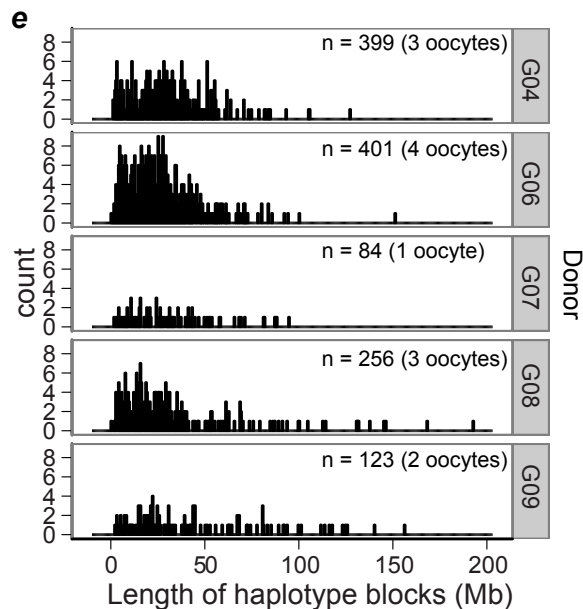

Supplement: NIHMS63148-supplement-Fig_S4.pdf [file NIHMS63148-supplement-Fig_S4.pdf]

maternal (n = 1507)    paternal (n = 931)

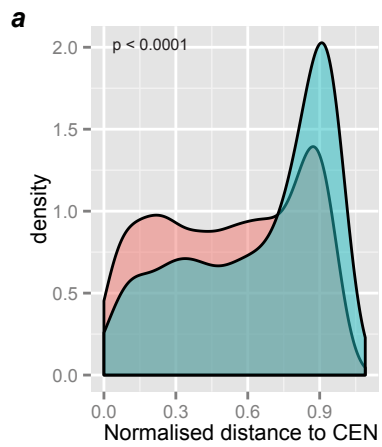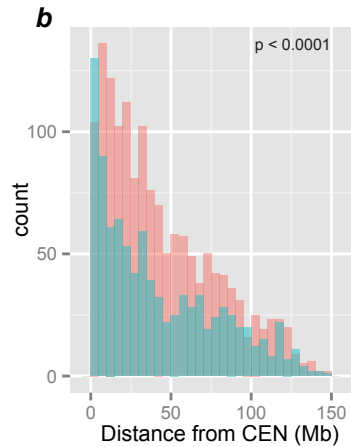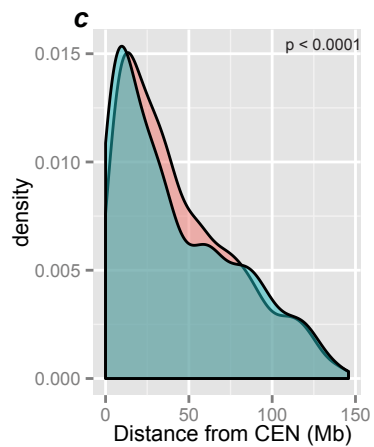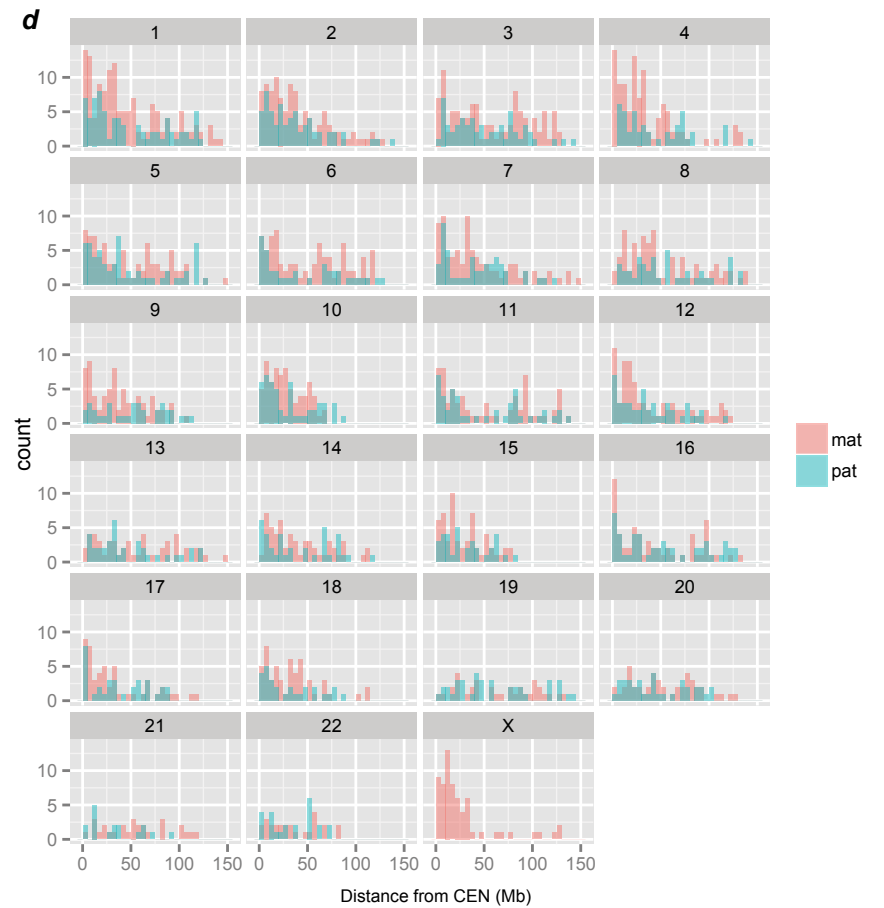

Supplement: NIHMS63148-supplement-Fig_S5.pdf [file NIHMS63148-supplement-Fig_S5.pdf]
